# Supplementary material for: Site selection for the best clay-hosted repository in Switzerland
Source: Copernicus journal article supplement (doi:10.5194/sand-1-51-2021), 2021-11-10

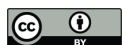

*Supplement of*

## **Site selection for the best clay-hosted repository in Switzerland**

**Tim Vietor and Michael Schnellmann**

*Correspondence to:* Tim Vietor (tim.vietor@nagra.ch)

The copyright of individual parts of the supplement might differ from the article licence.

# Site selection for the best clay-hosted repository in Switzerland

**Tim Vietor** and Michael Schnellmann

National Cooperative for the Management of  
Radioactive Waste

**nagra.**

# Swiss storage for 12.400 fuel elements and 600 pcs of vitrified waste

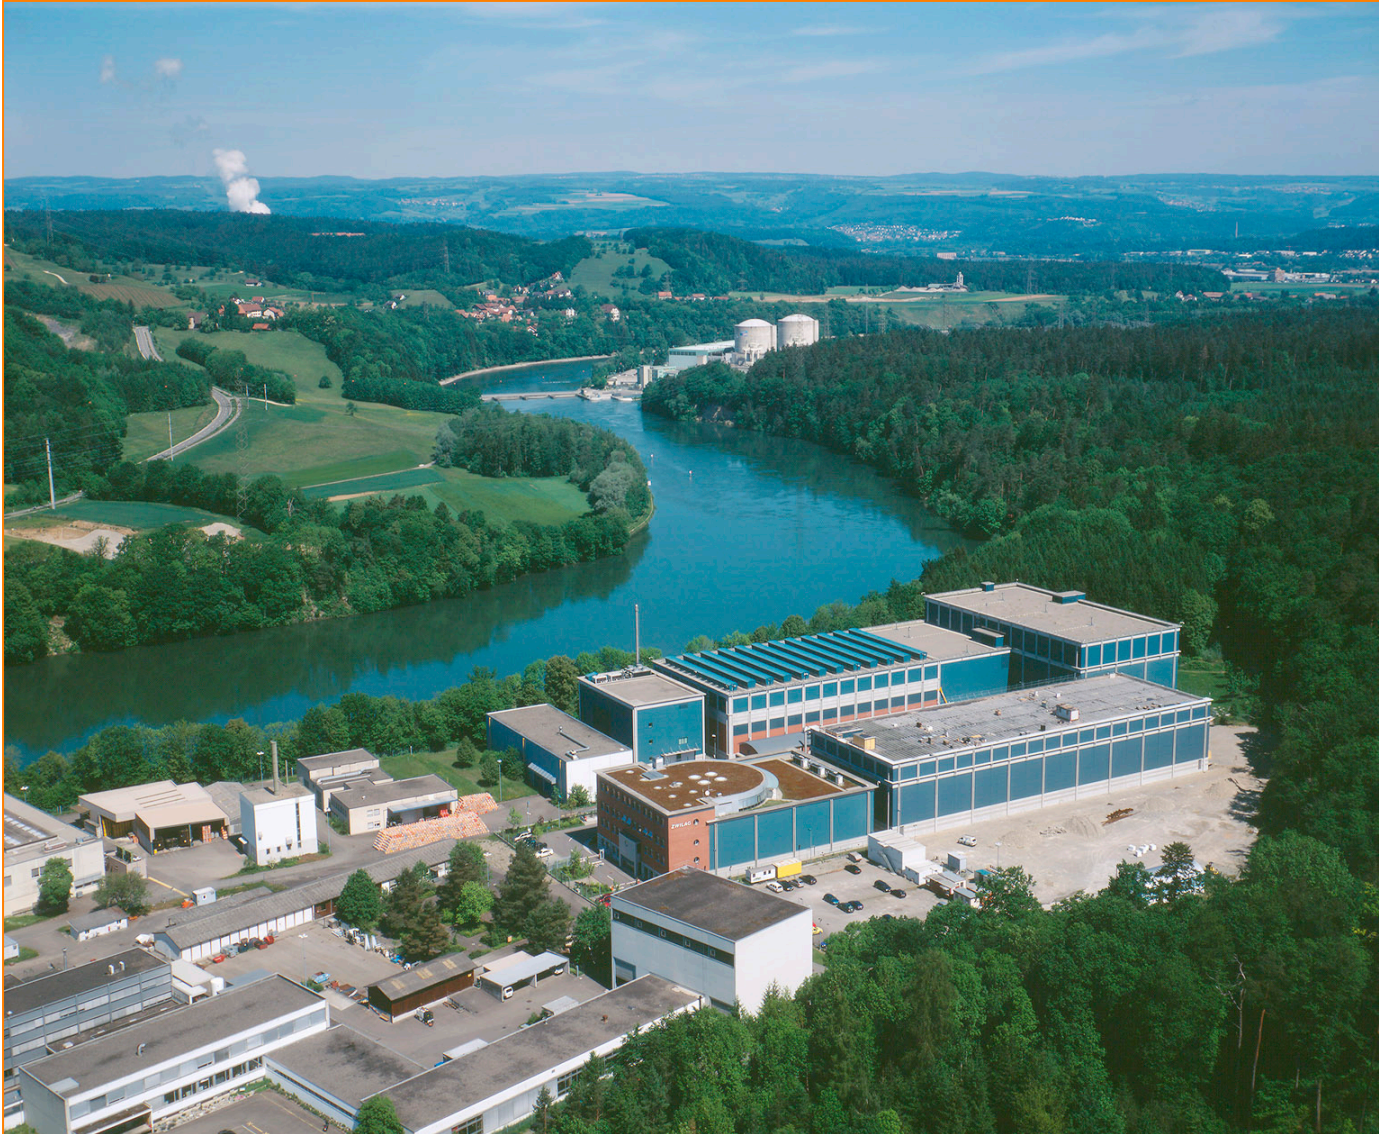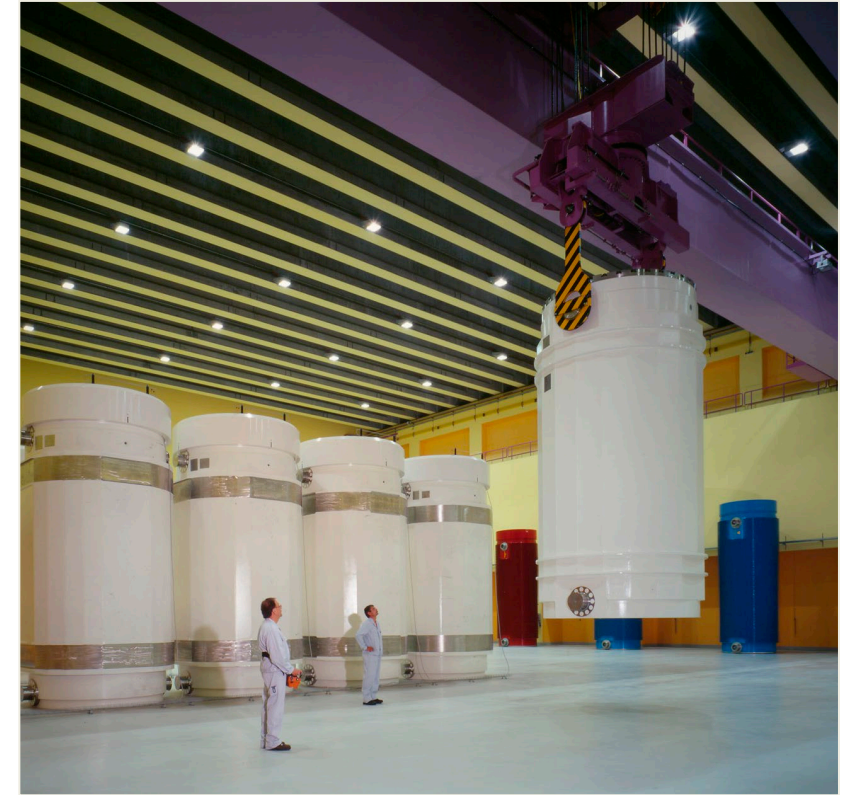

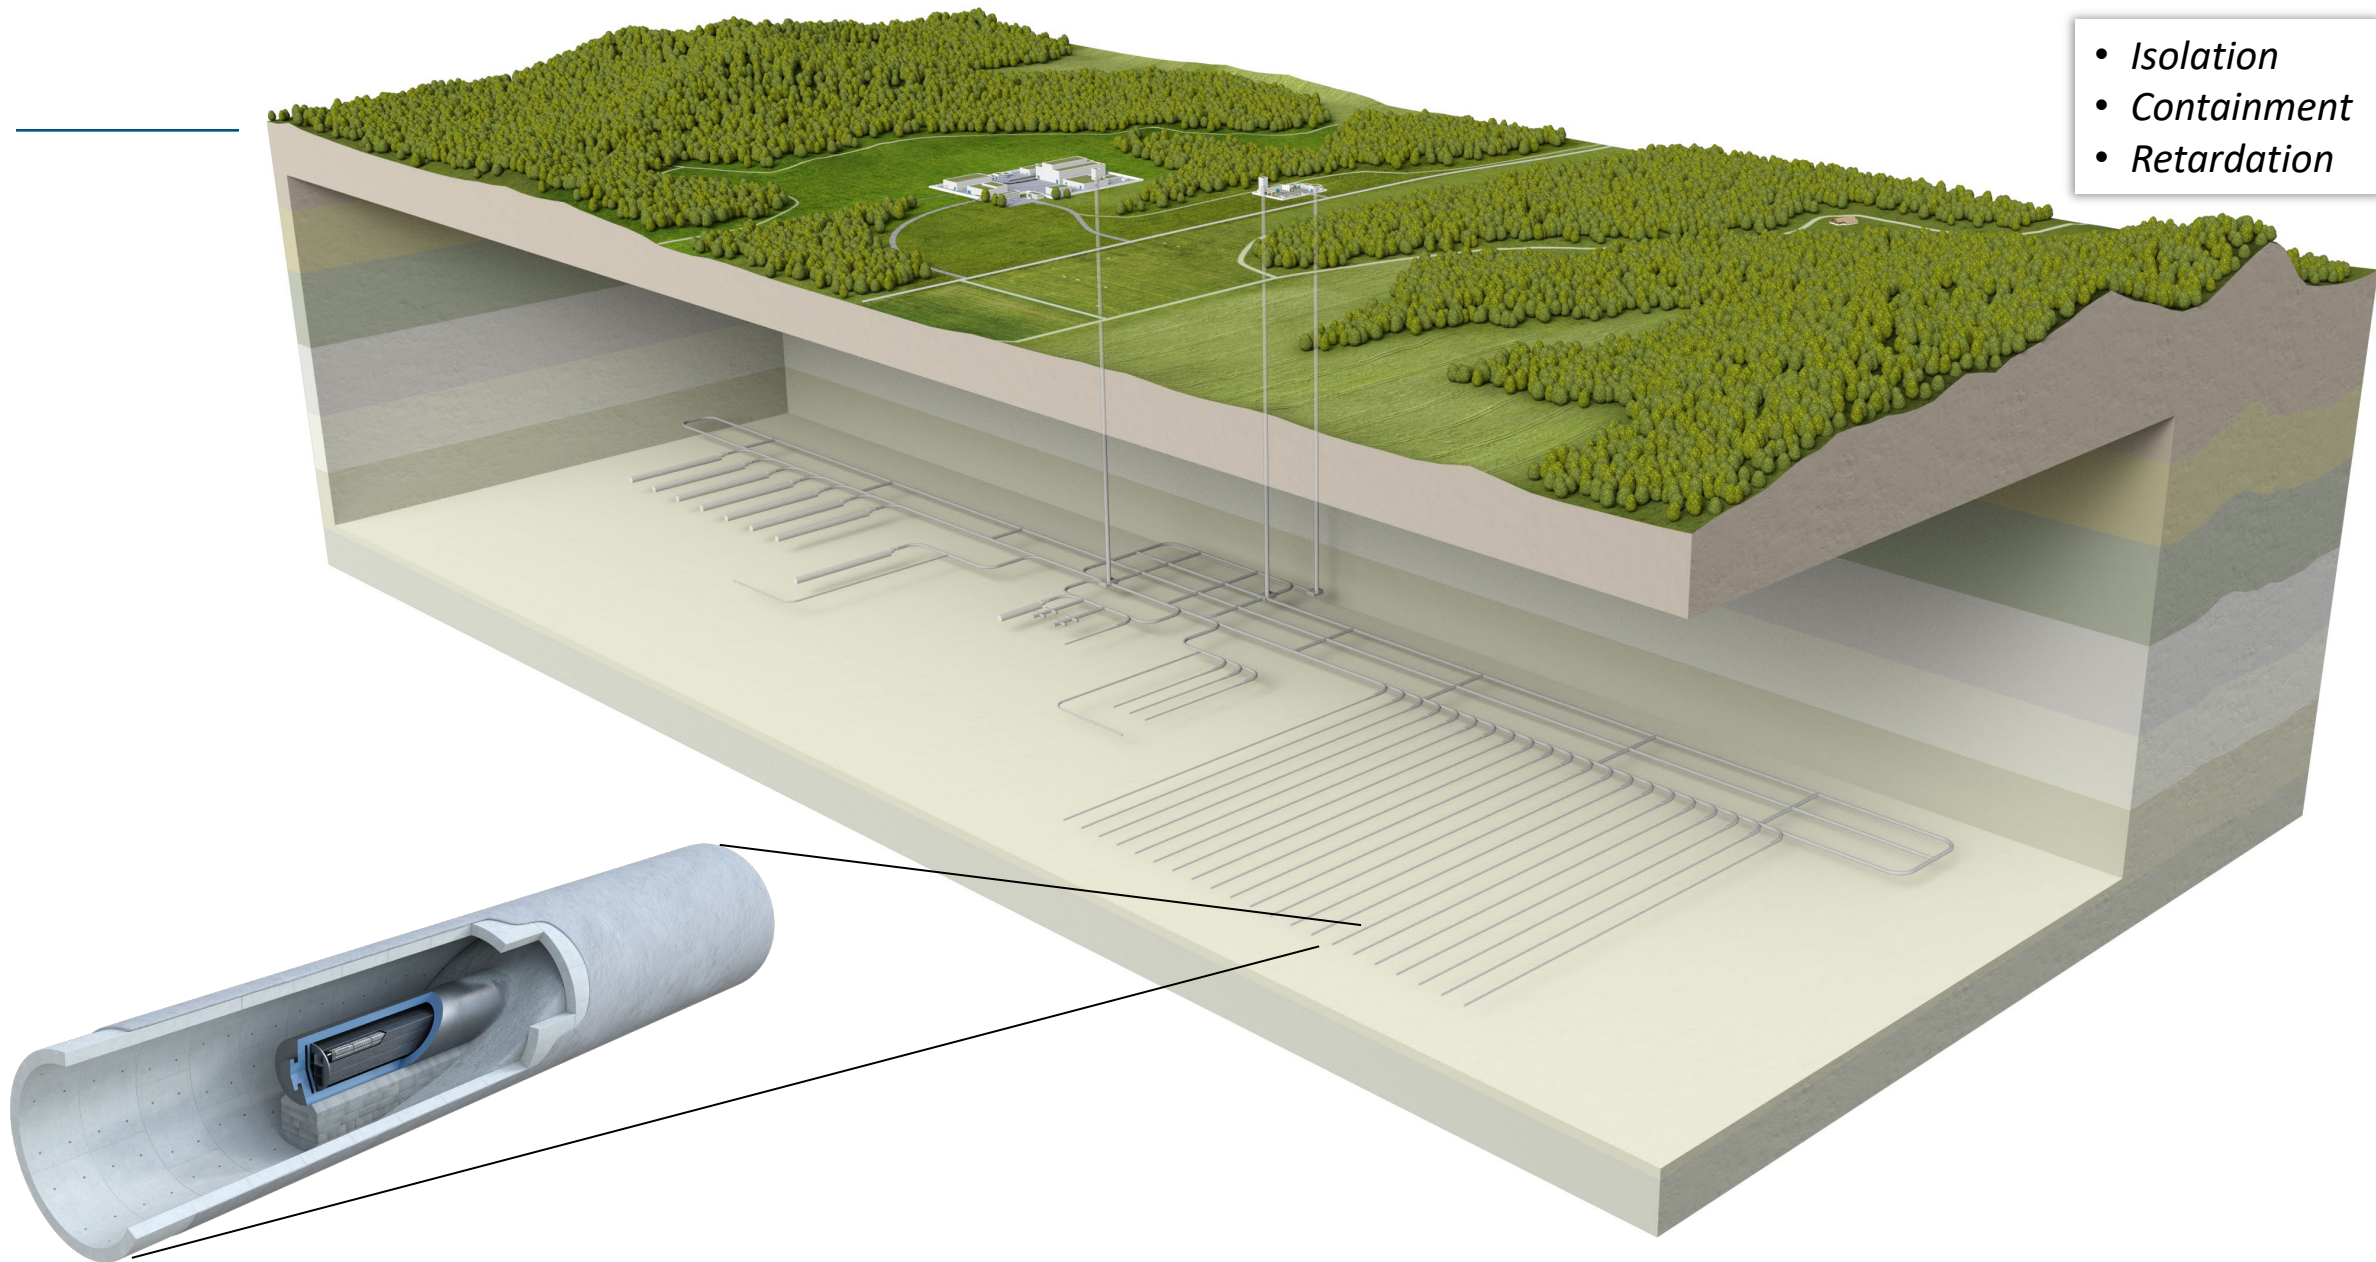

# White map to site: 2008 re-start of process

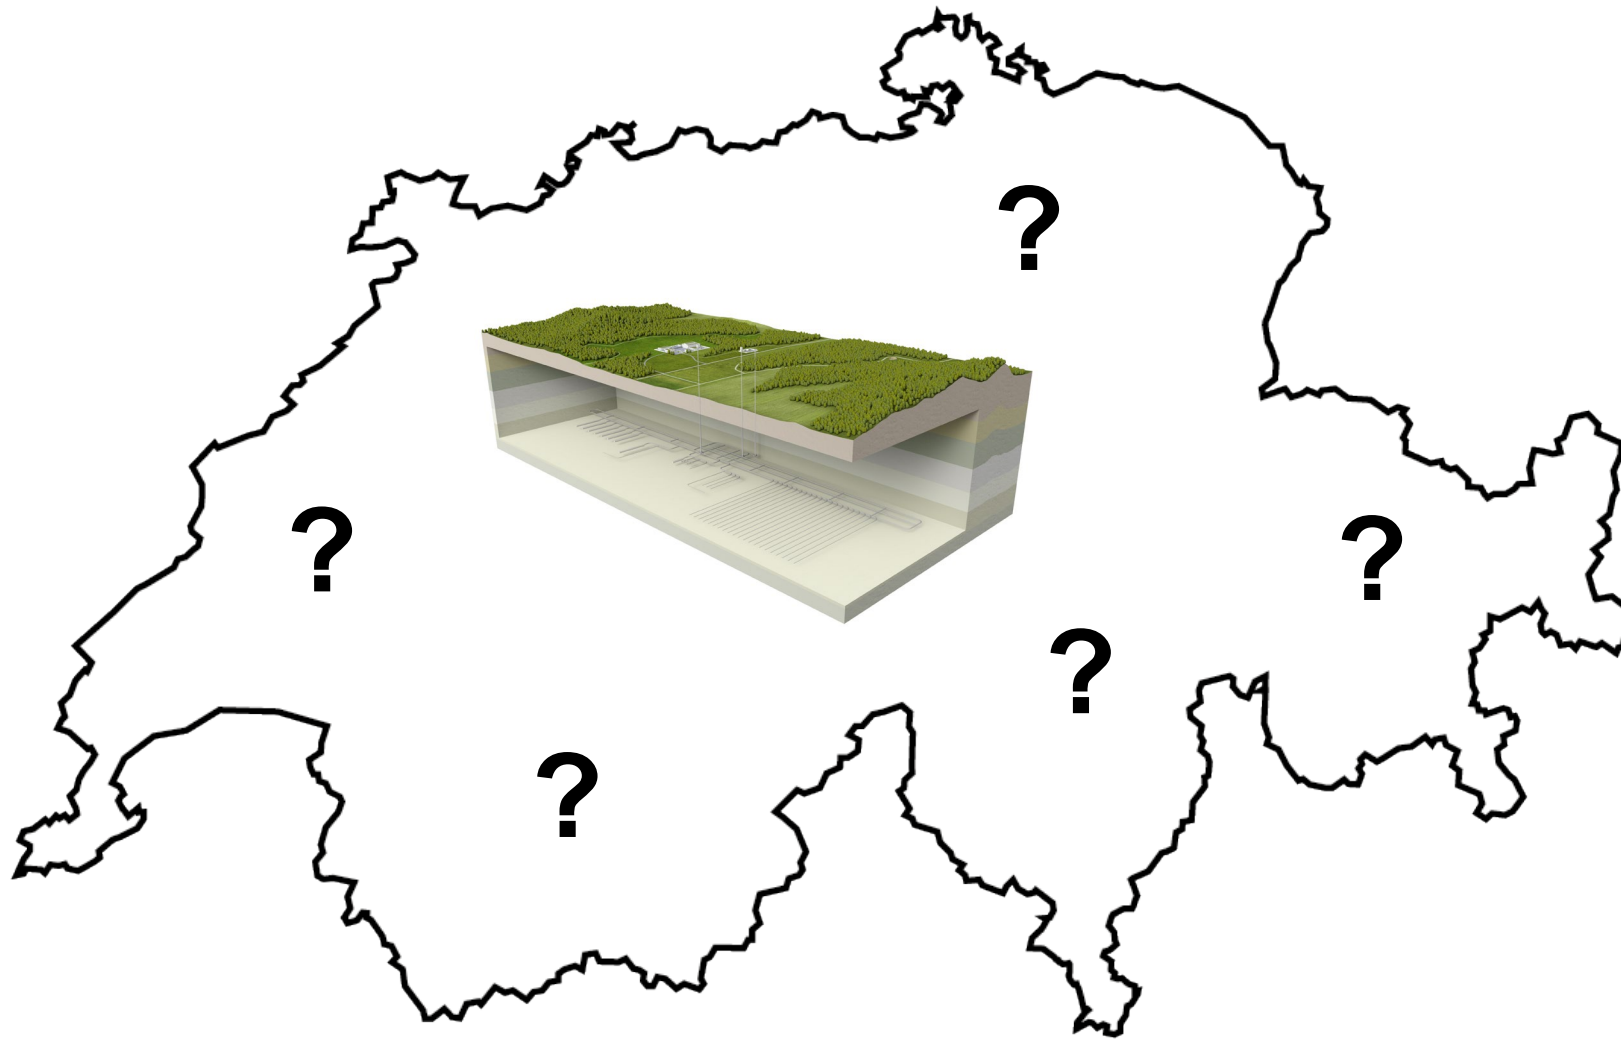

# Criteria for site evaluation: safety and technical feasibility

- 13 criteria in 4 groups
- For all steps of the site-selection process
- No cut-off values
- Application per step to be proposed by implementer

| Criteria group                                                    | Criteria                                                                                                                                                                                                                                                                         |
|-------------------------------------------------------------------|----------------------------------------------------------------------------------------------------------------------------------------------------------------------------------------------------------------------------------------------------------------------------------|
| 1. Properties of the host rock and the effective containment zone |  1.1 Spatial extent<br>1.2 Hydraulic barrier effect<br>1.3 Geochemical conditions<br> 1.4 Release pathways |
| 2. Long-term stability                                            | 2.1 Stability of the site and rock properties<br>2.2 Erosion<br> 2.3 Repository-induced influences<br>2.4 Conflicts of use                                                                    |
| 3. Reliability of geological findings                             | 3.1 Ease of characterisation of the rock<br>3.2 Explorability of spatial conditions<br>3.3 Predictability of long-term changes                                                                                                                                                   |
| 4. Engineering suitability                                        |  4.1 Rock mechanical properties and conditions<br>4.2 Underground access and drainage                                                                                                         |

BFE 2008

 See next slides

# Nationwide Stepwise Screening HLW Example: steps 1 and 2

2008 «White Map of Switzerland»

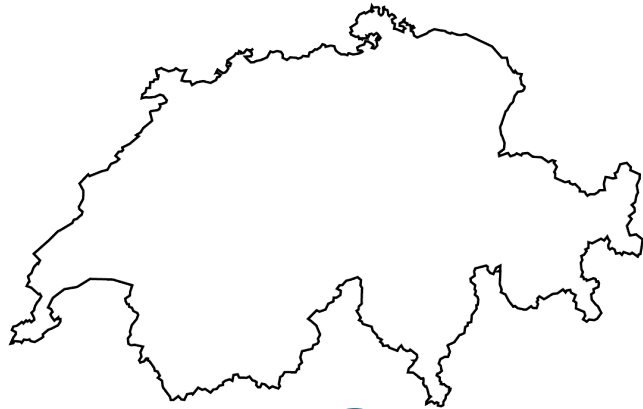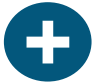

GEODYNAMICS

Vertical Uplift Rates [mm/a]

NW

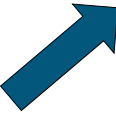

Suitable Geotectonic Units

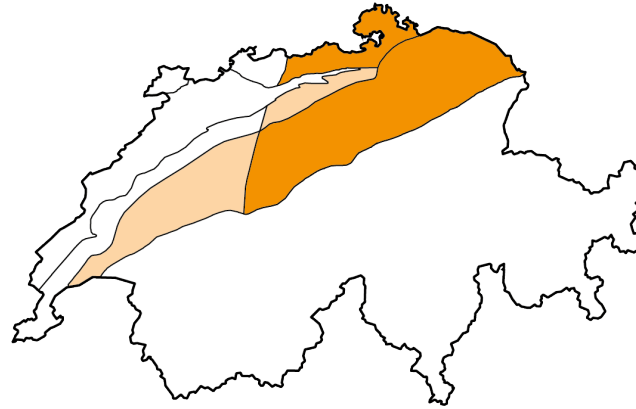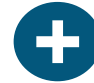

HOST ROCK DISTRIBUTION

(Depth, Thickness)

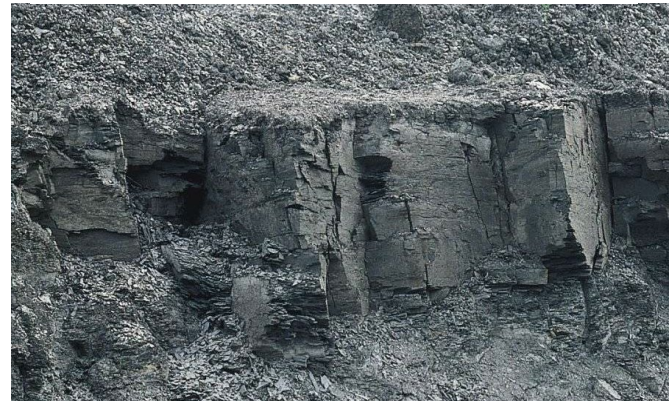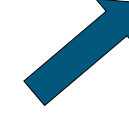

Hostrock Configurations

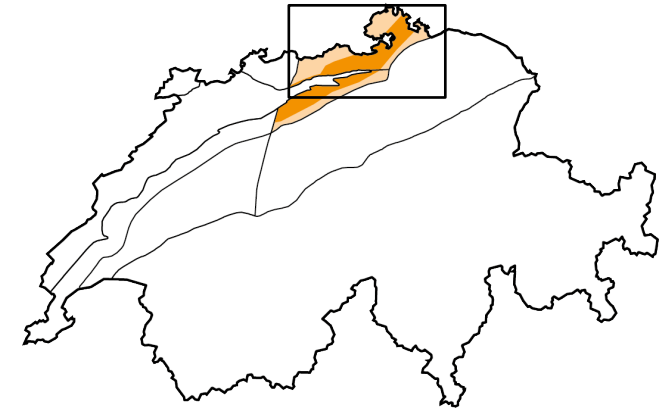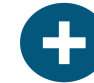

STRUCTURAL FRAMEWORK

(Regional Fault Zones...)

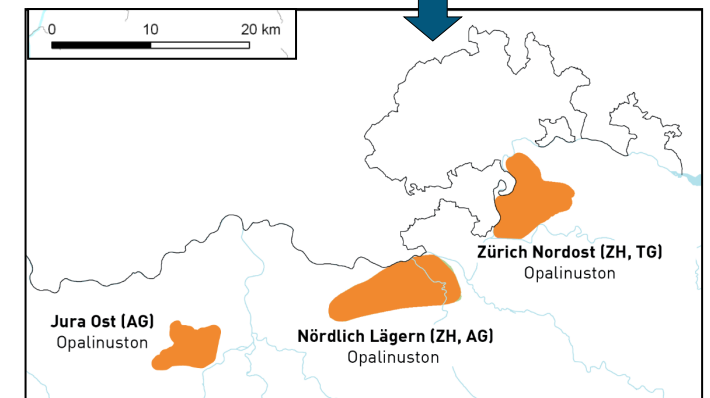

Announcement of site(s): fall 2022

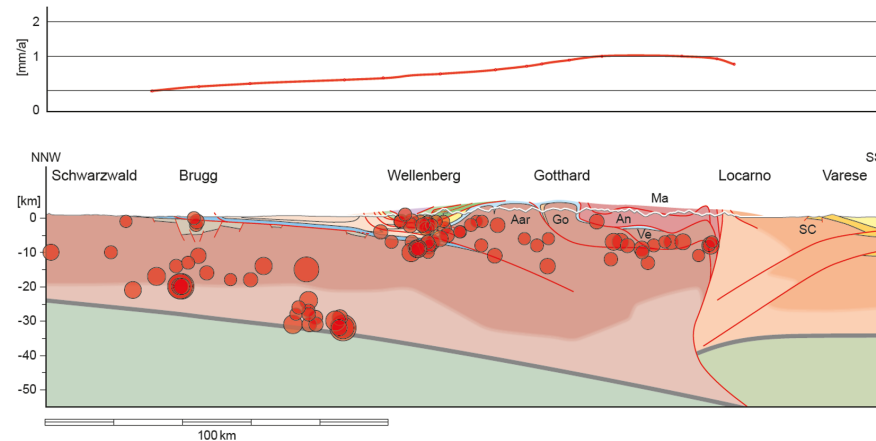

# Clay rocks: Low permeability at high clay content

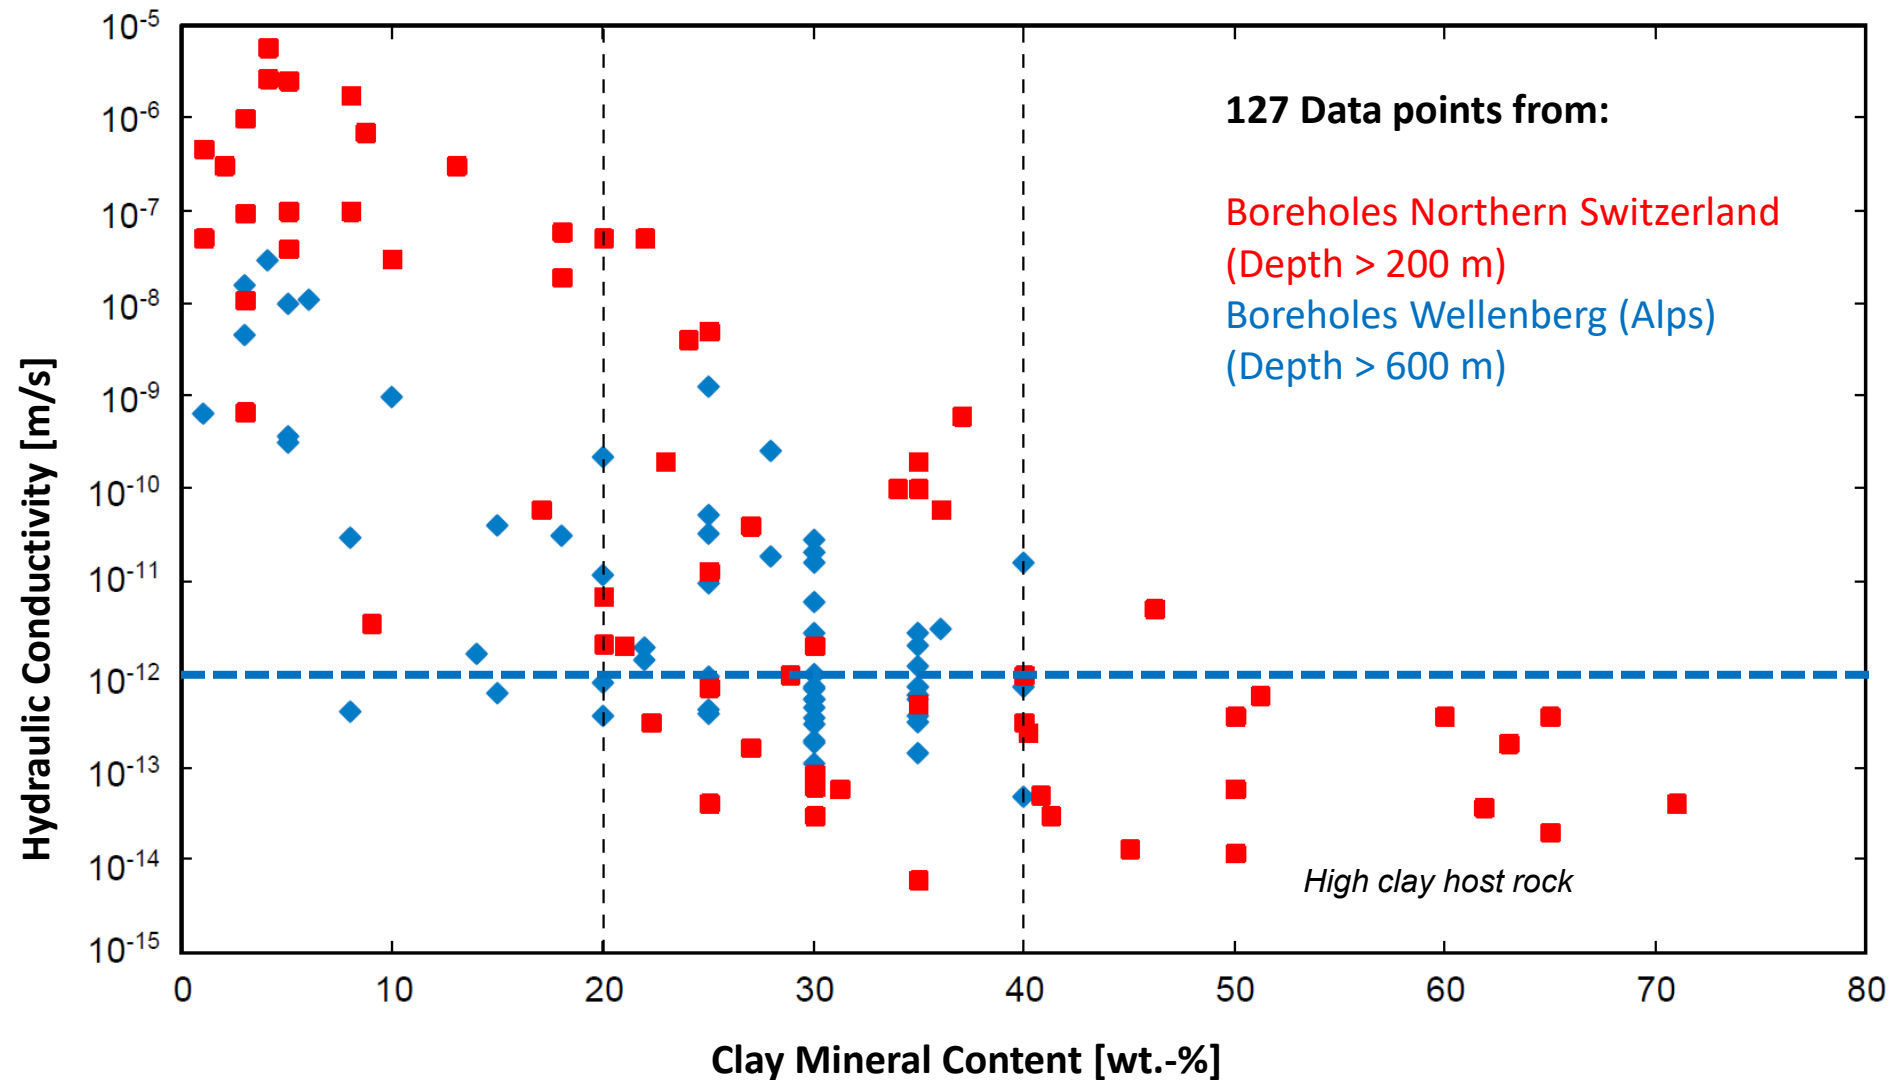

# Clays in marine succession: explorable by seismic methods

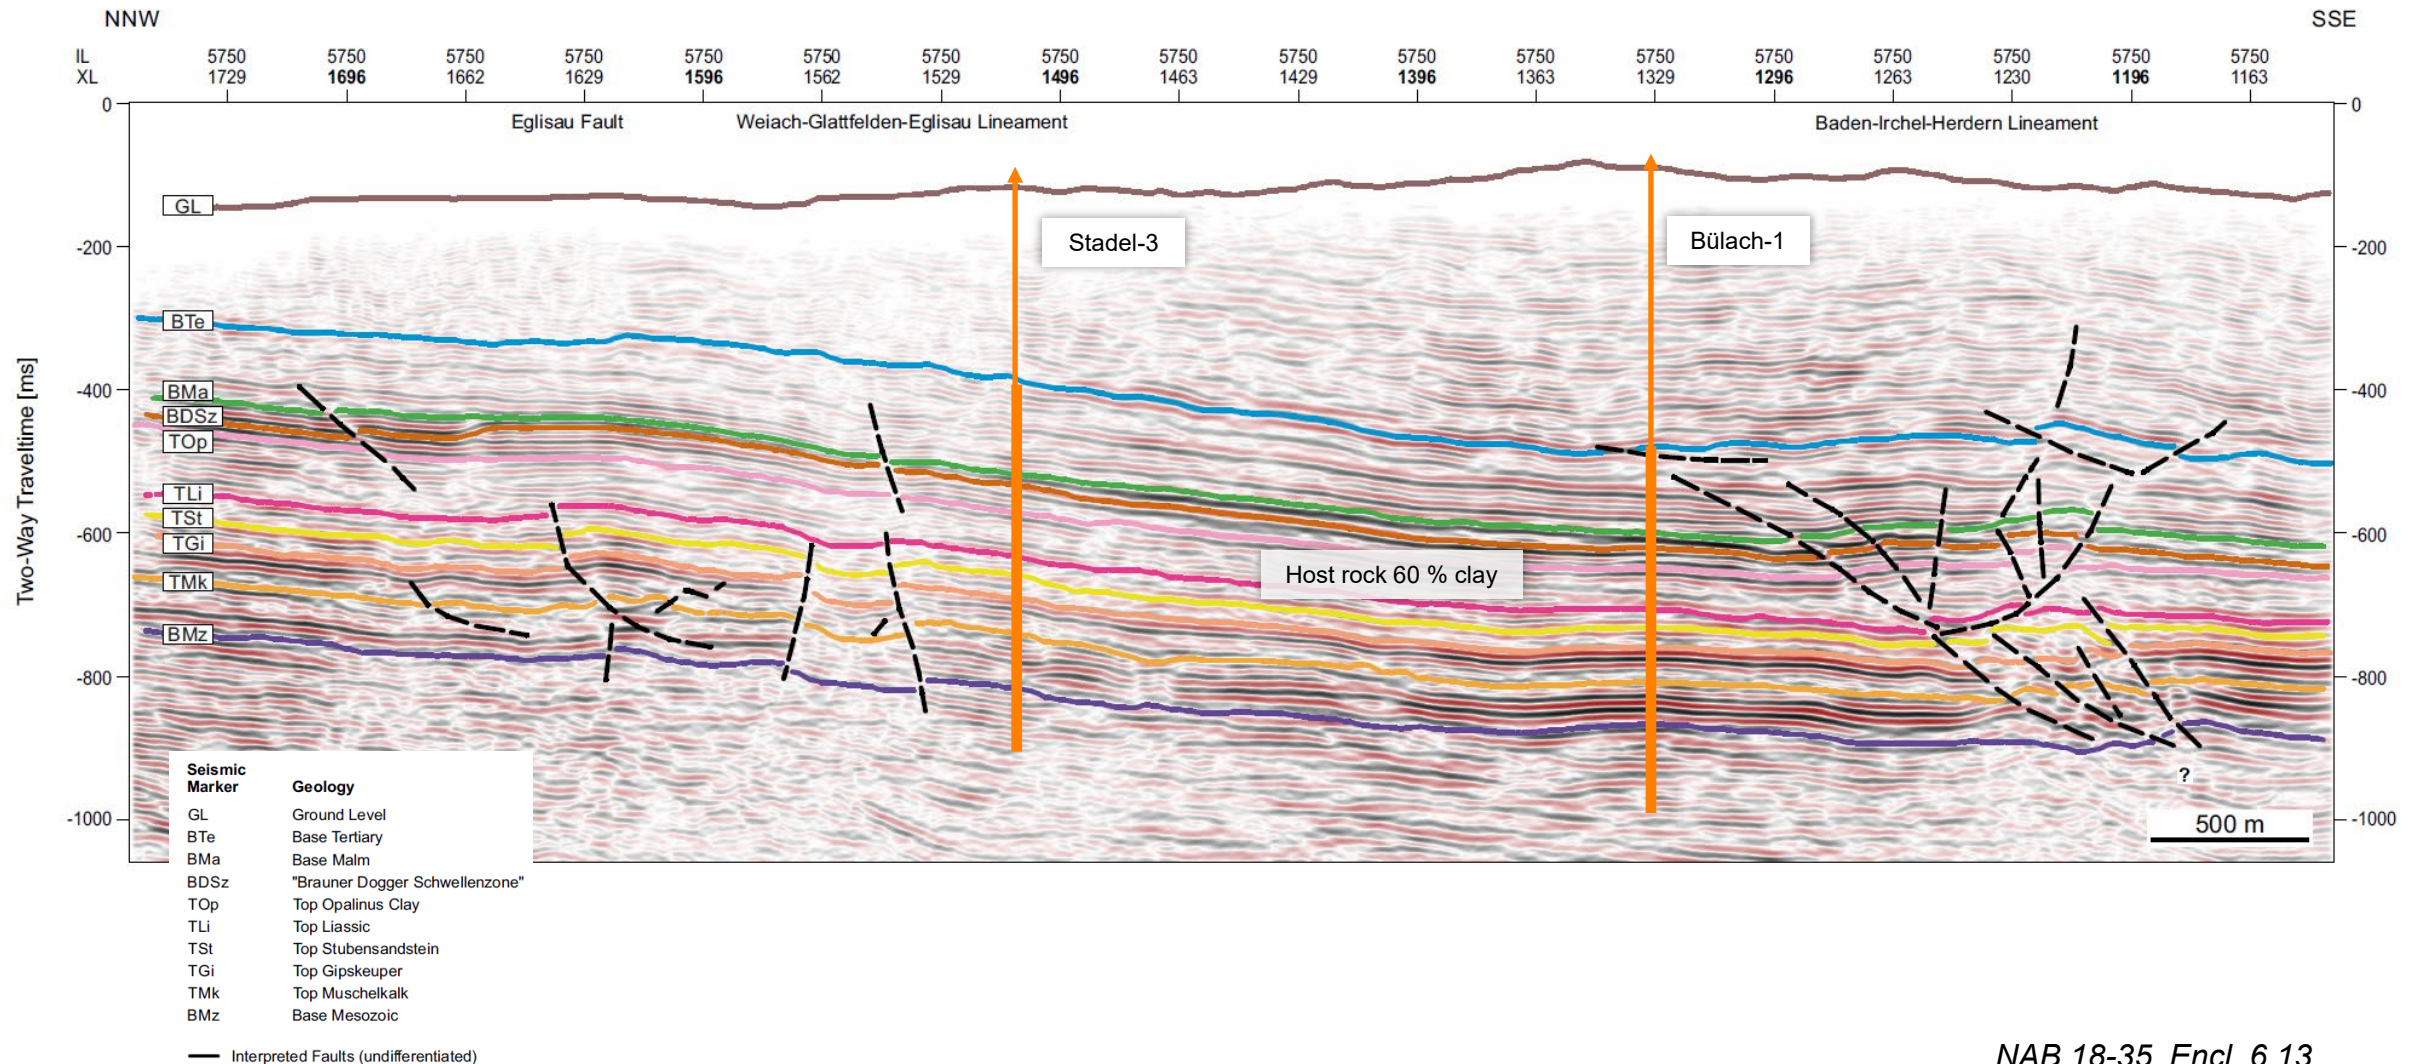

NAB 18-35, Encl. 6.13

# 3D Seismics: spatial extent of tectonically quiet zones (crit. 2.1)

Red lines: Faults based on amplitude picking

Blue Lines: indications for minor faults on attribute maps

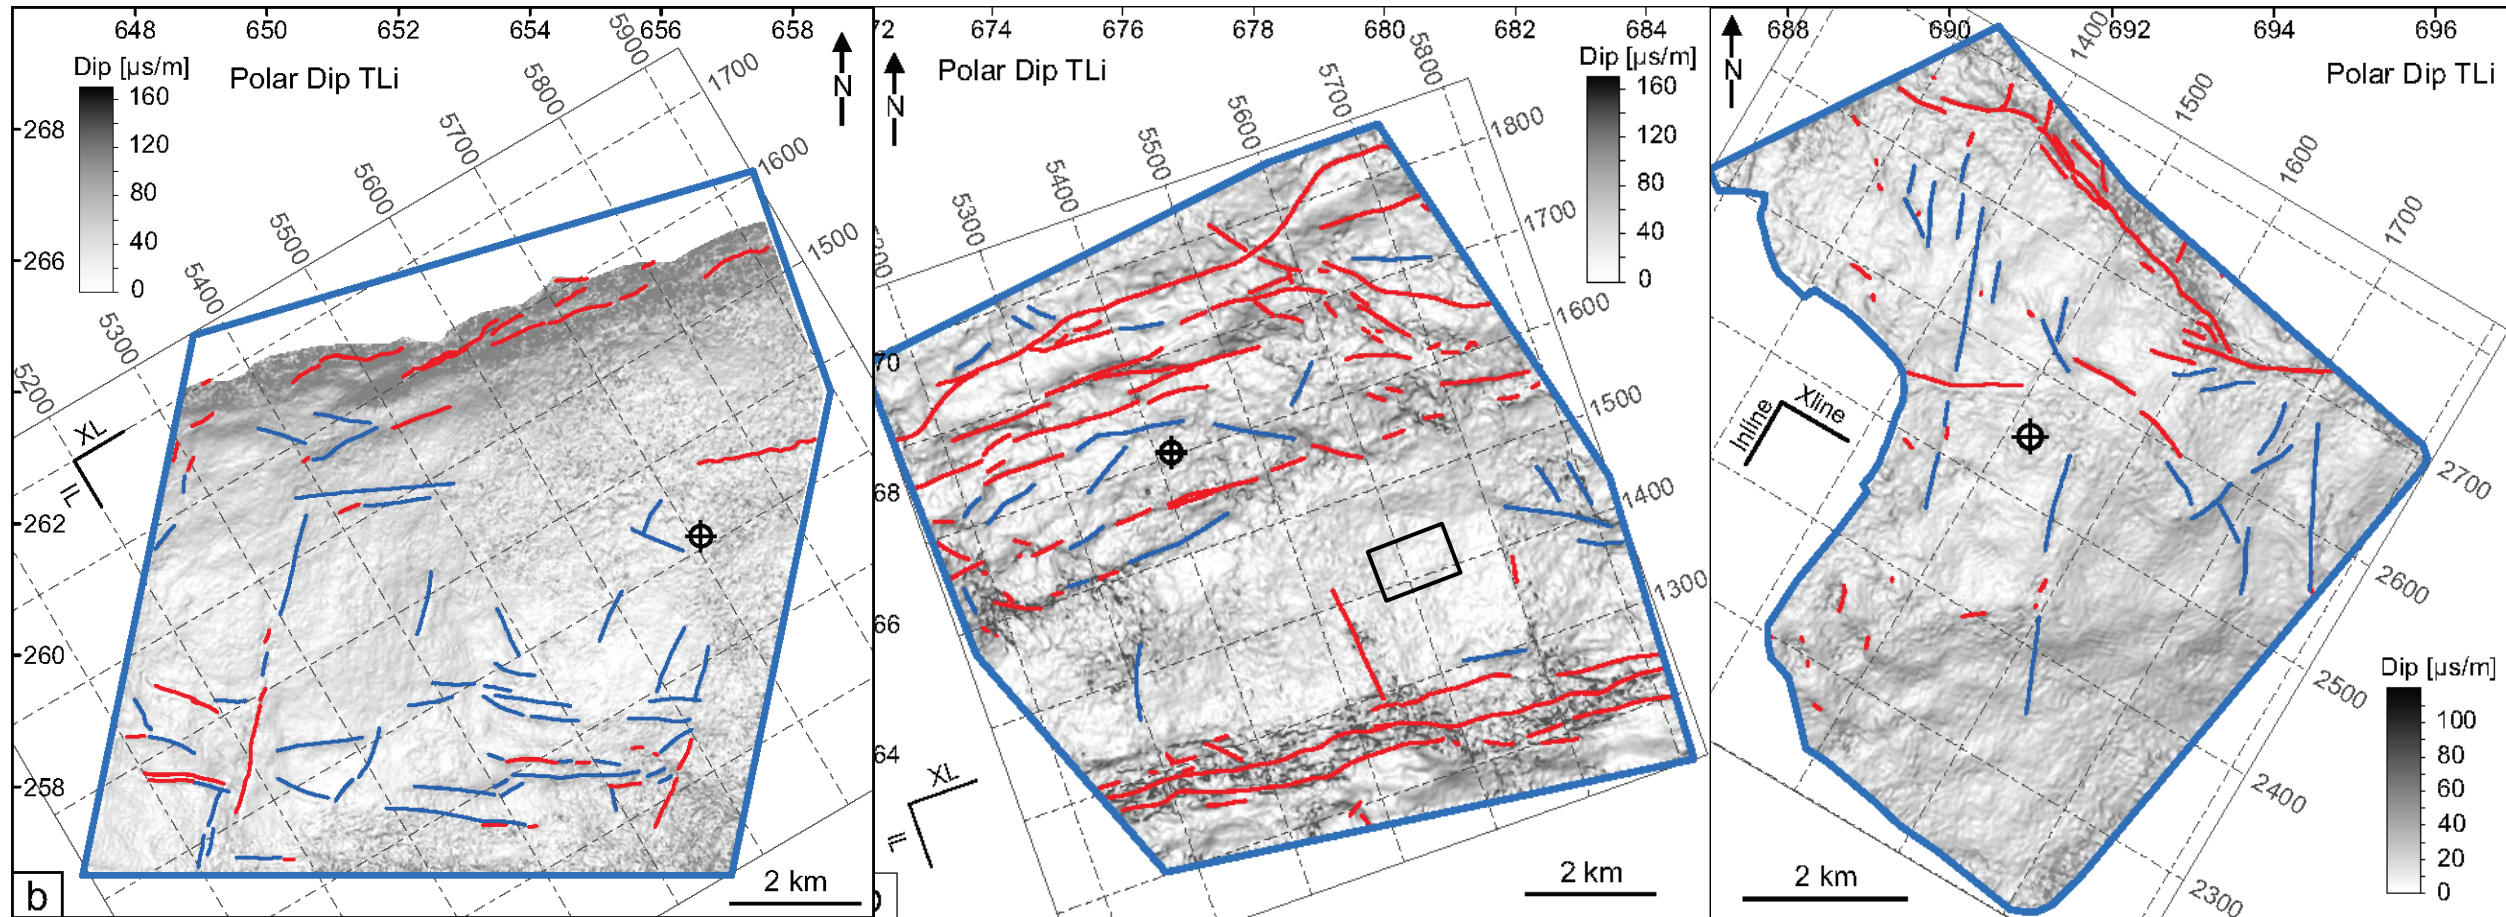

# Surface based investigation: Integration of 3D-seismics and boreholes

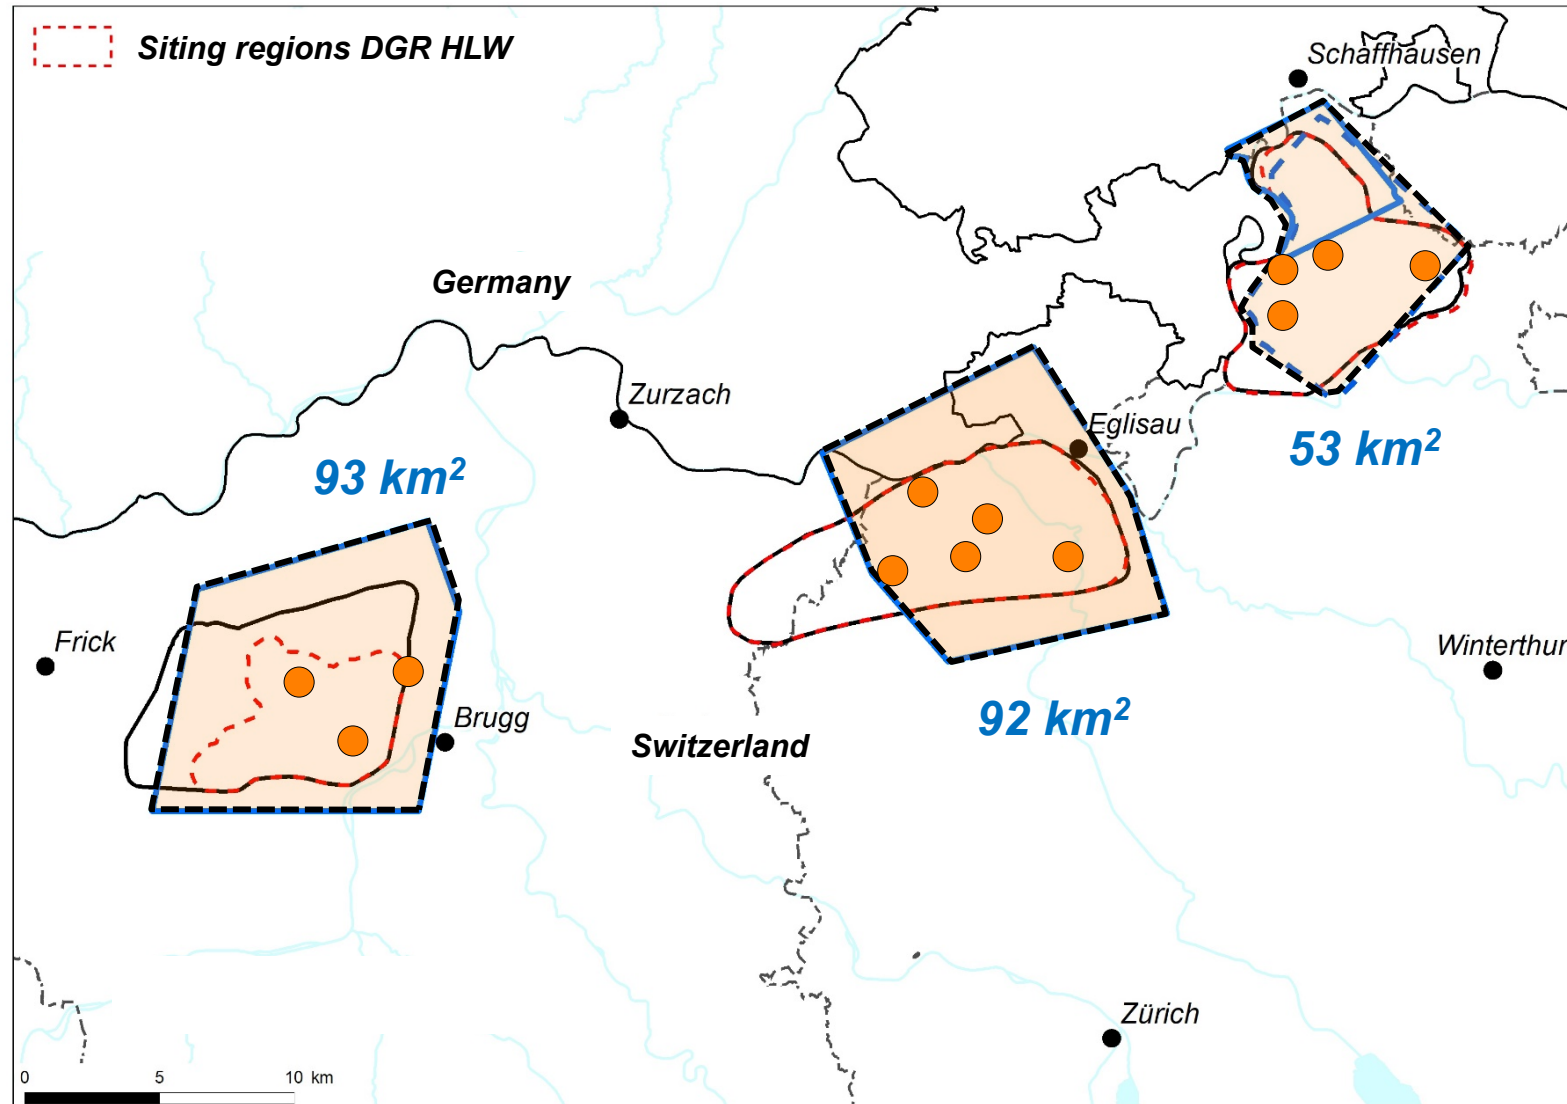

- 
- 9 boreholes 829 to 1370 m
  - 5300 m of core
  - 90 packertests – 33 in host formation

# Drill site to decision base: ensure reliable, reproducible data

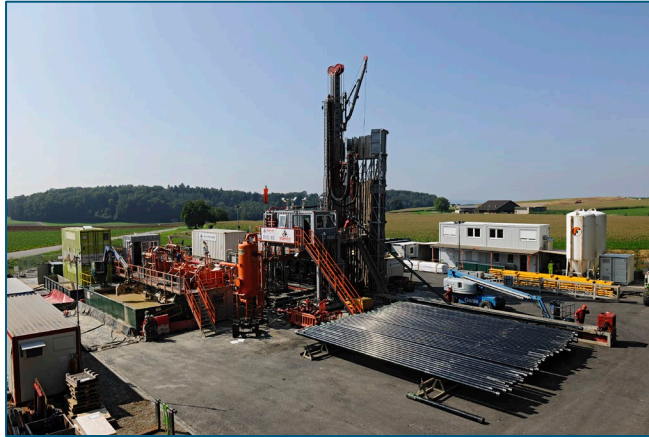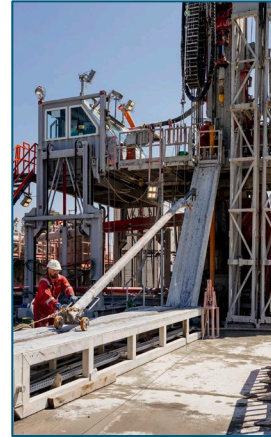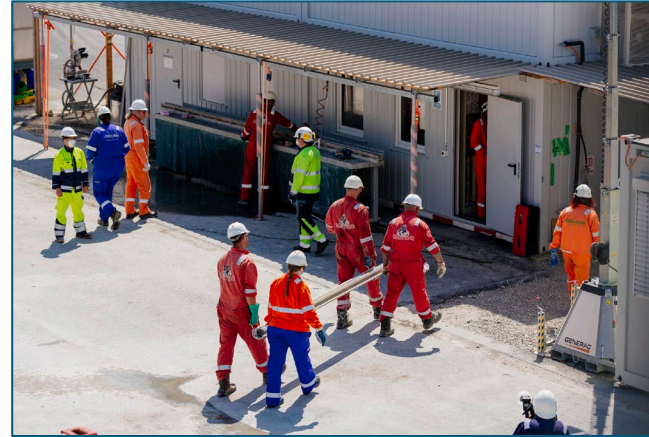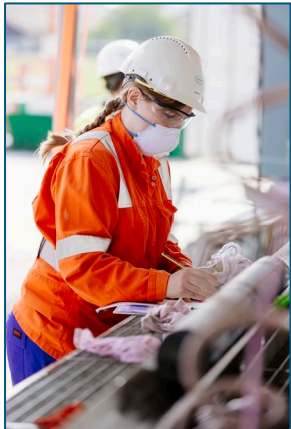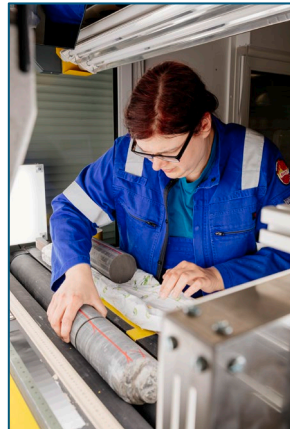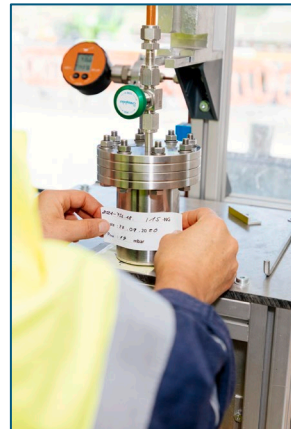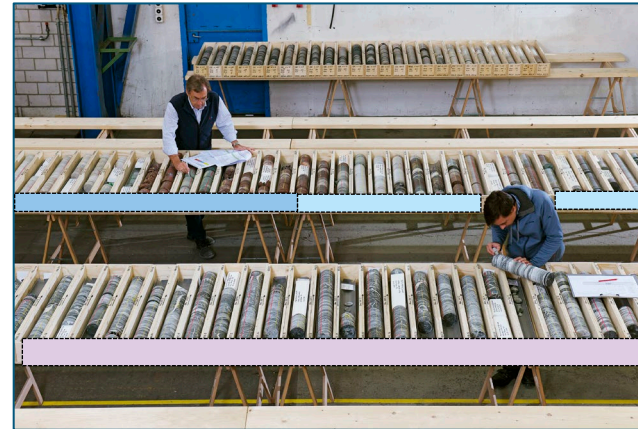

Trüllikon

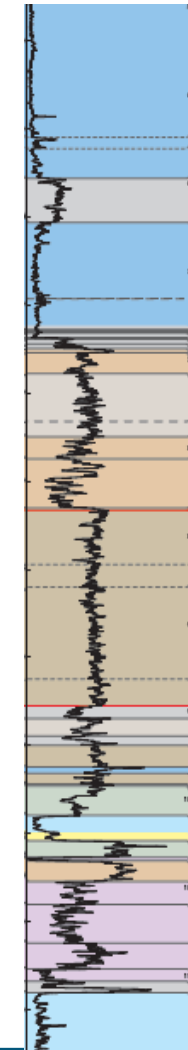

*Curves: gamma – count  
increasing clay content to  
right*

# Cored boreholes for comparison of natural barrier layers

Host rock thickness with low variation; differences in surrounding aquitard sequence

Opalinuston

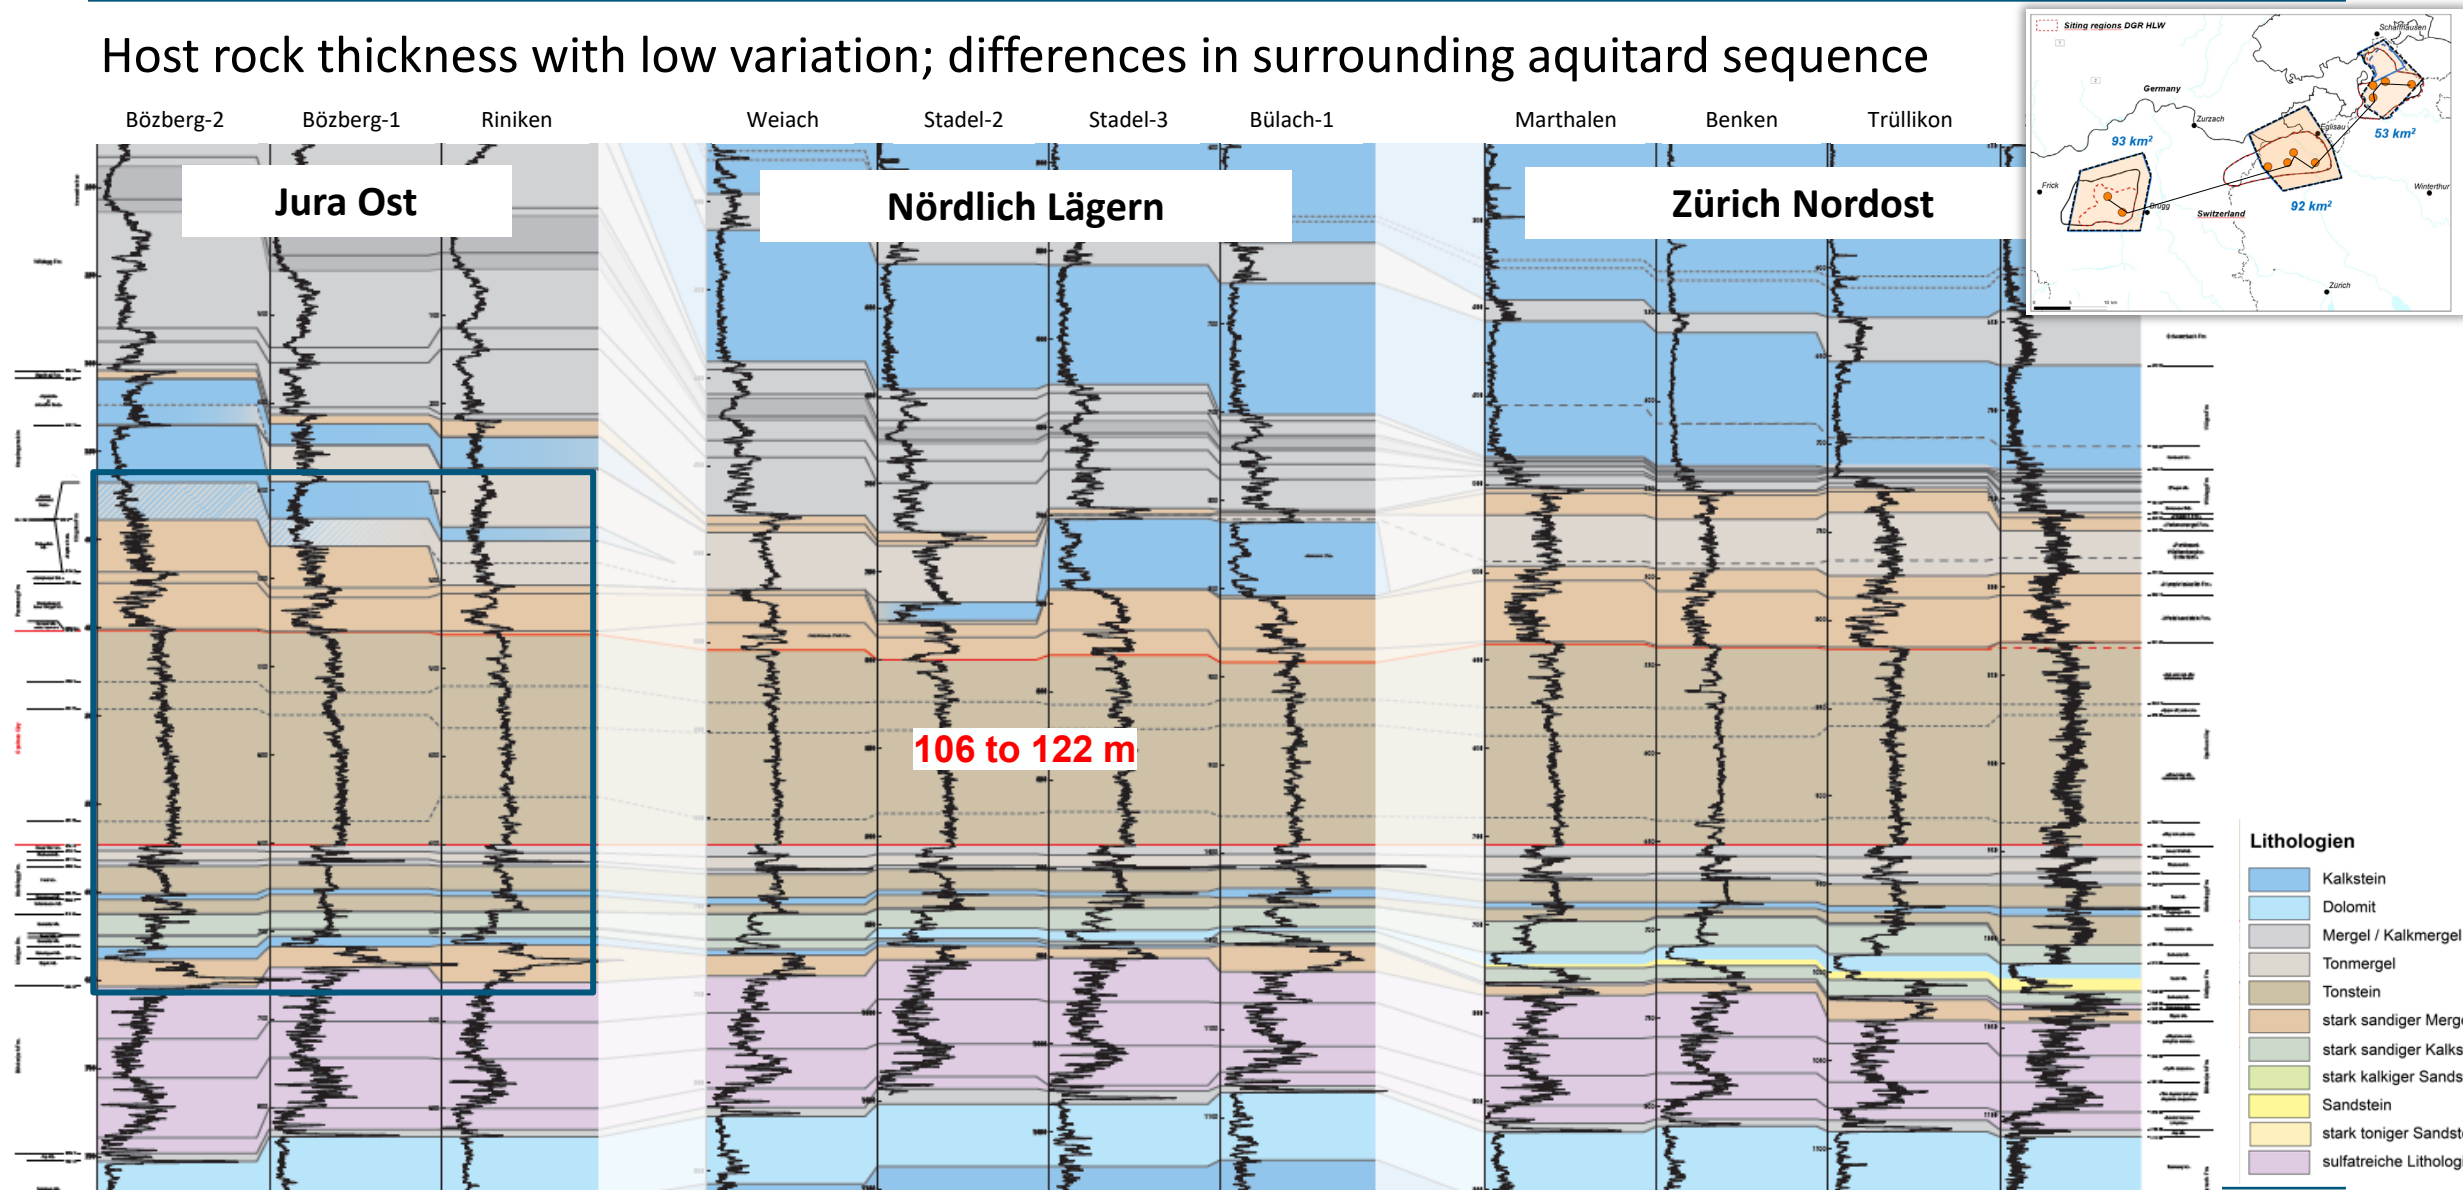

# Drilling results

## Opalinus Clay

- Stable climate conditions → uniform sediments
- High sedimentation rate  
(10'000 years / 1 m, confining units up to 1 Mio years / 1 m)
- Highly correlatable → 10s of kms very similar
- Little tectonics → uniform thickness

## For the DGR

- Average clay content 60%
- Very low hydraulic conductivity ( $1e-12$  m/s or less)
- Reliably self-sealing
- Very low uncertainties
- → **backbone of safety case**

*Black curves:  
increasing clay  
content to the right*

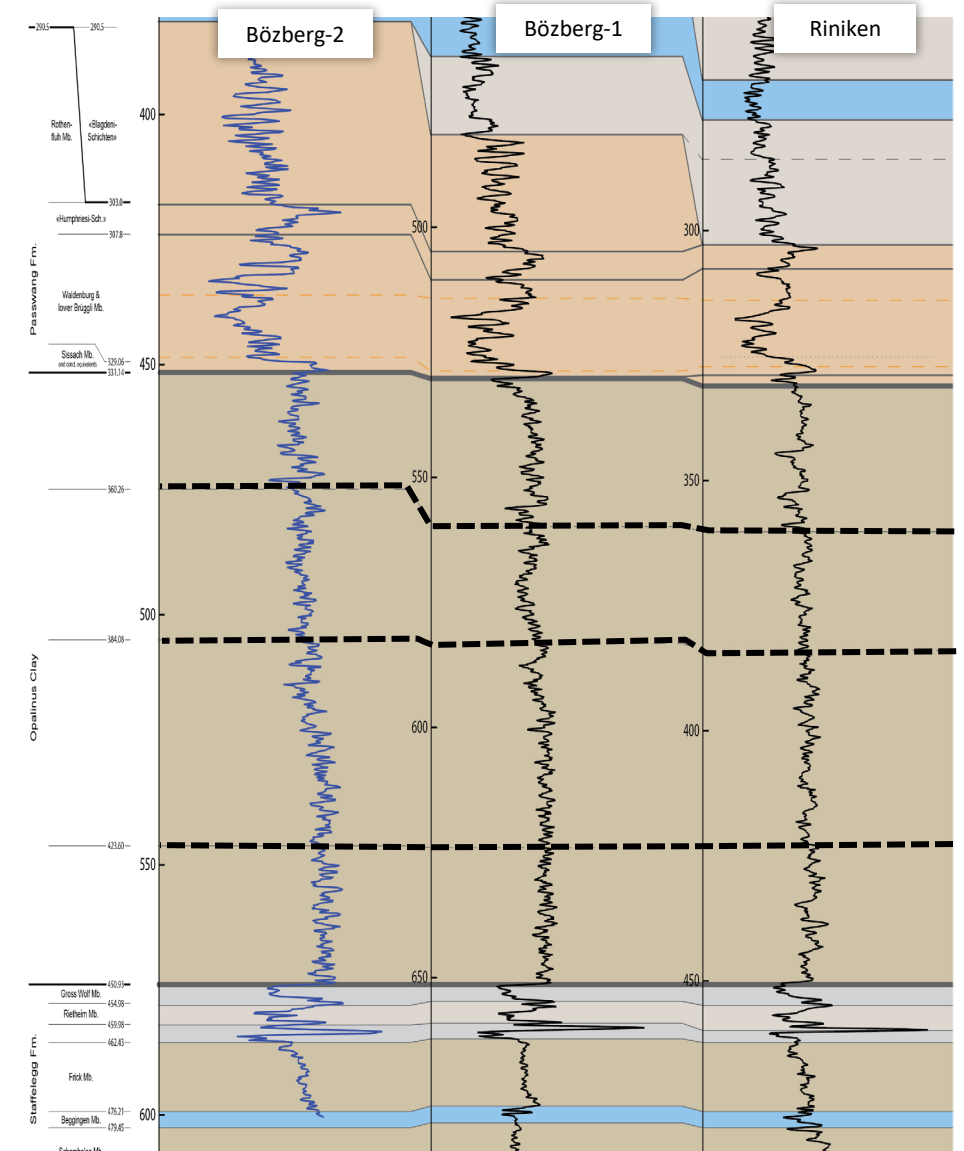

# Natural tracer distribution fits hydrogeological history (crit. grp. 1)

- Diffusion properties (plus sorption) govern transport of waste products
- Lab work on rock samples lead to diffusion coefficients
- Diffusion data fit geological history
- Excellent system understanding

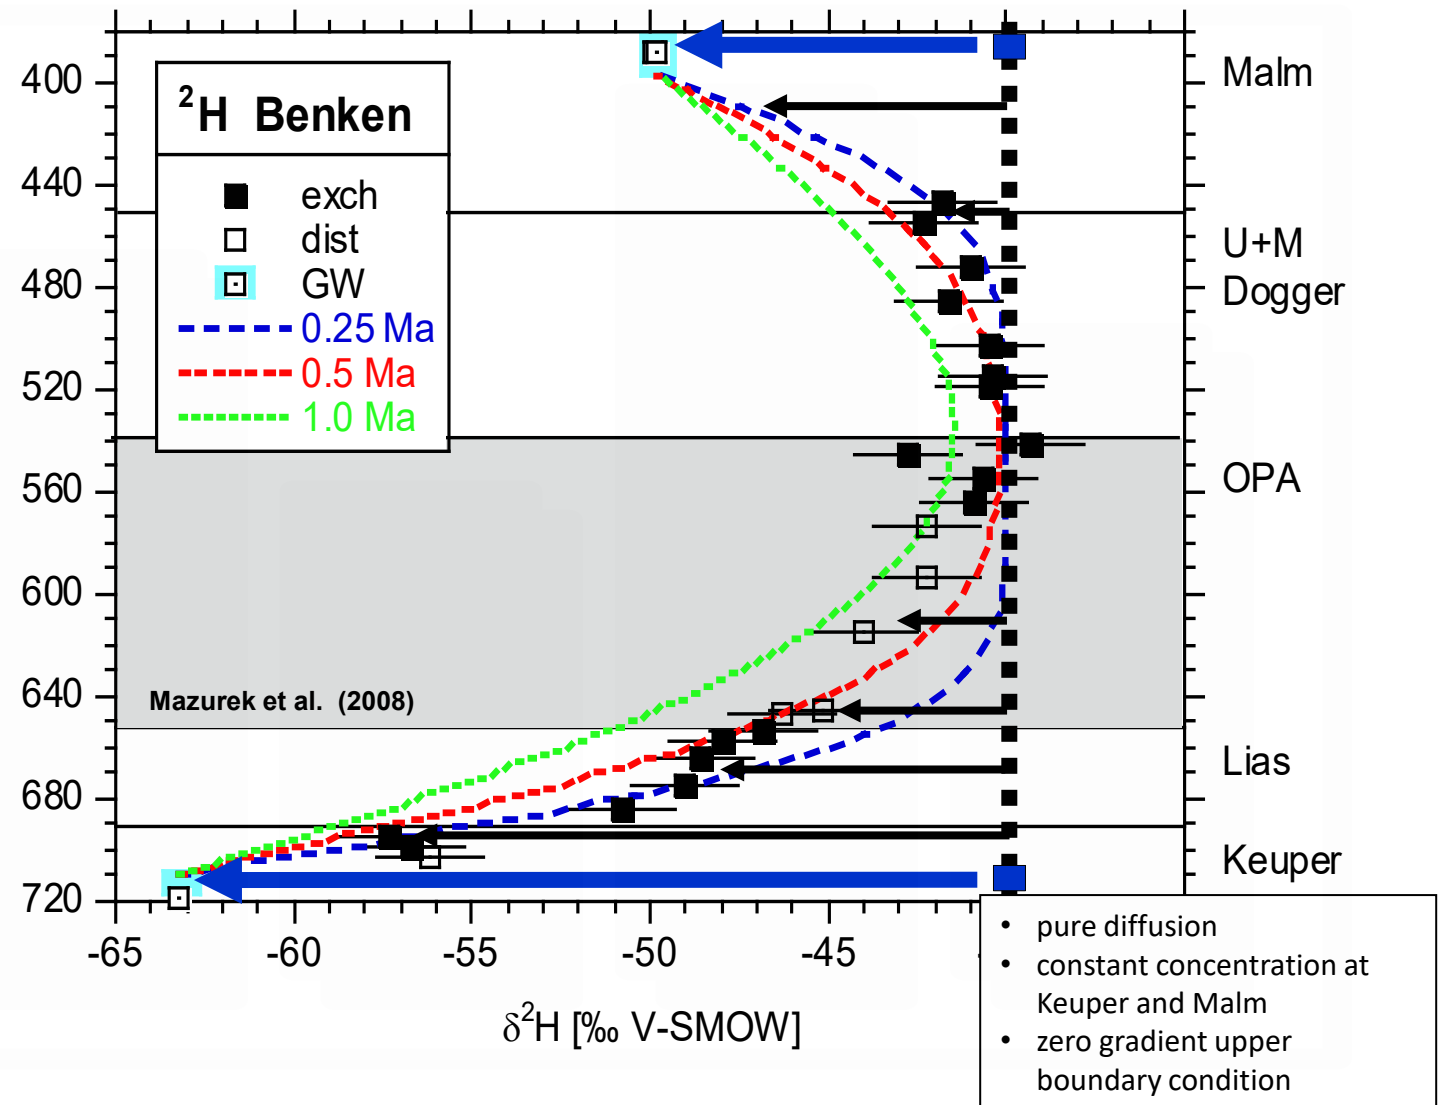

# Profiles $\delta^2\text{H}$

Porenwasser  
Grundwasser

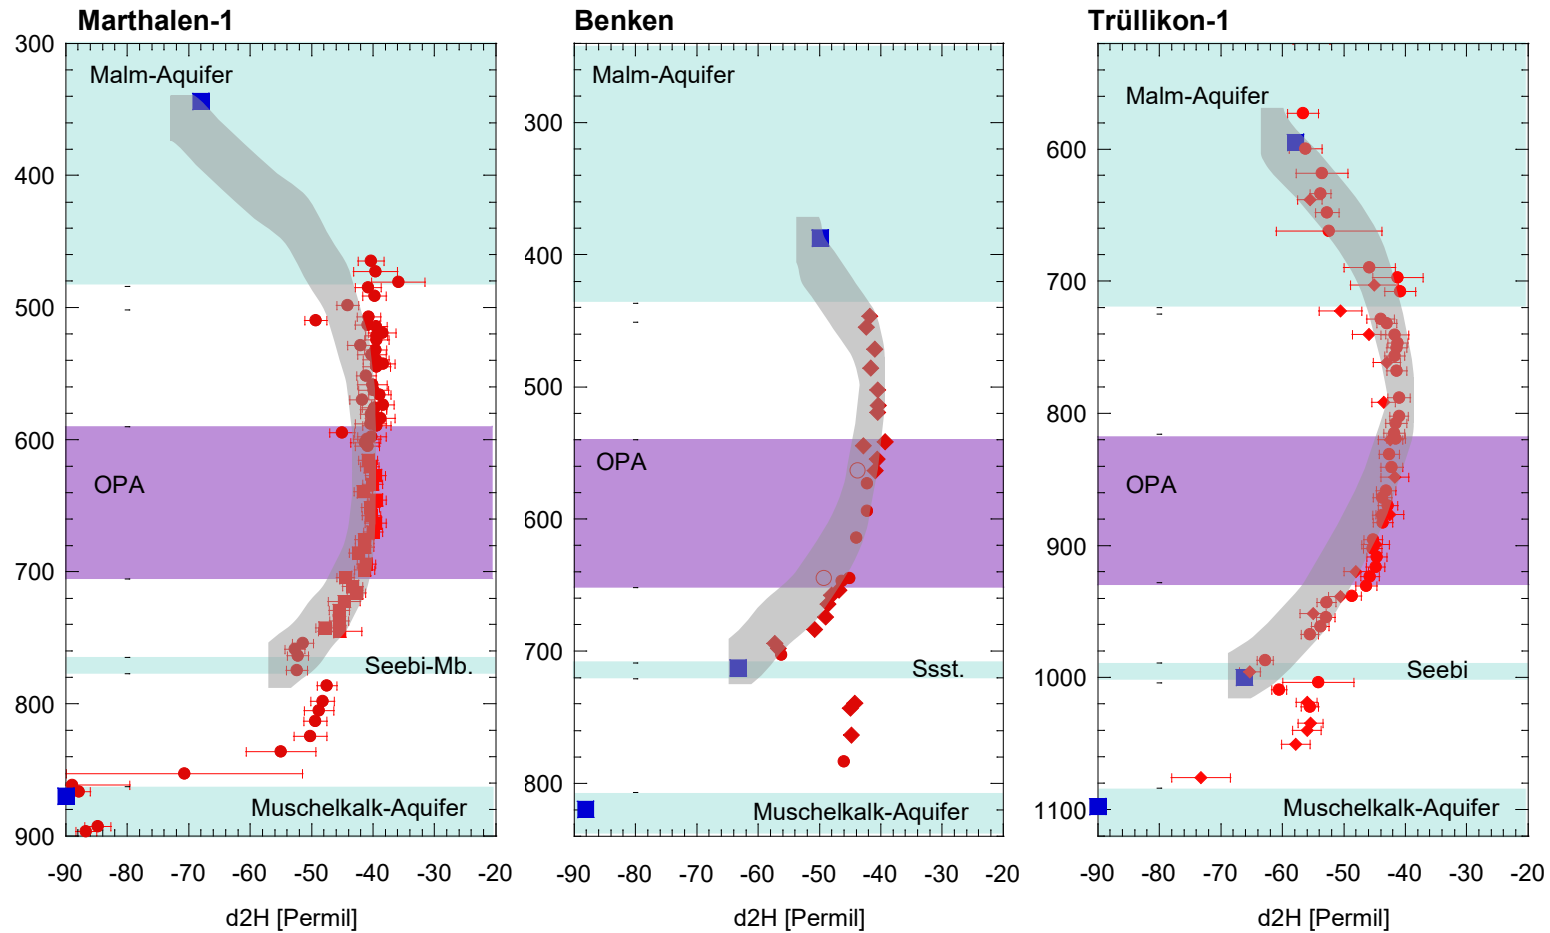

# Host rock and confining units lessons from dose calculations

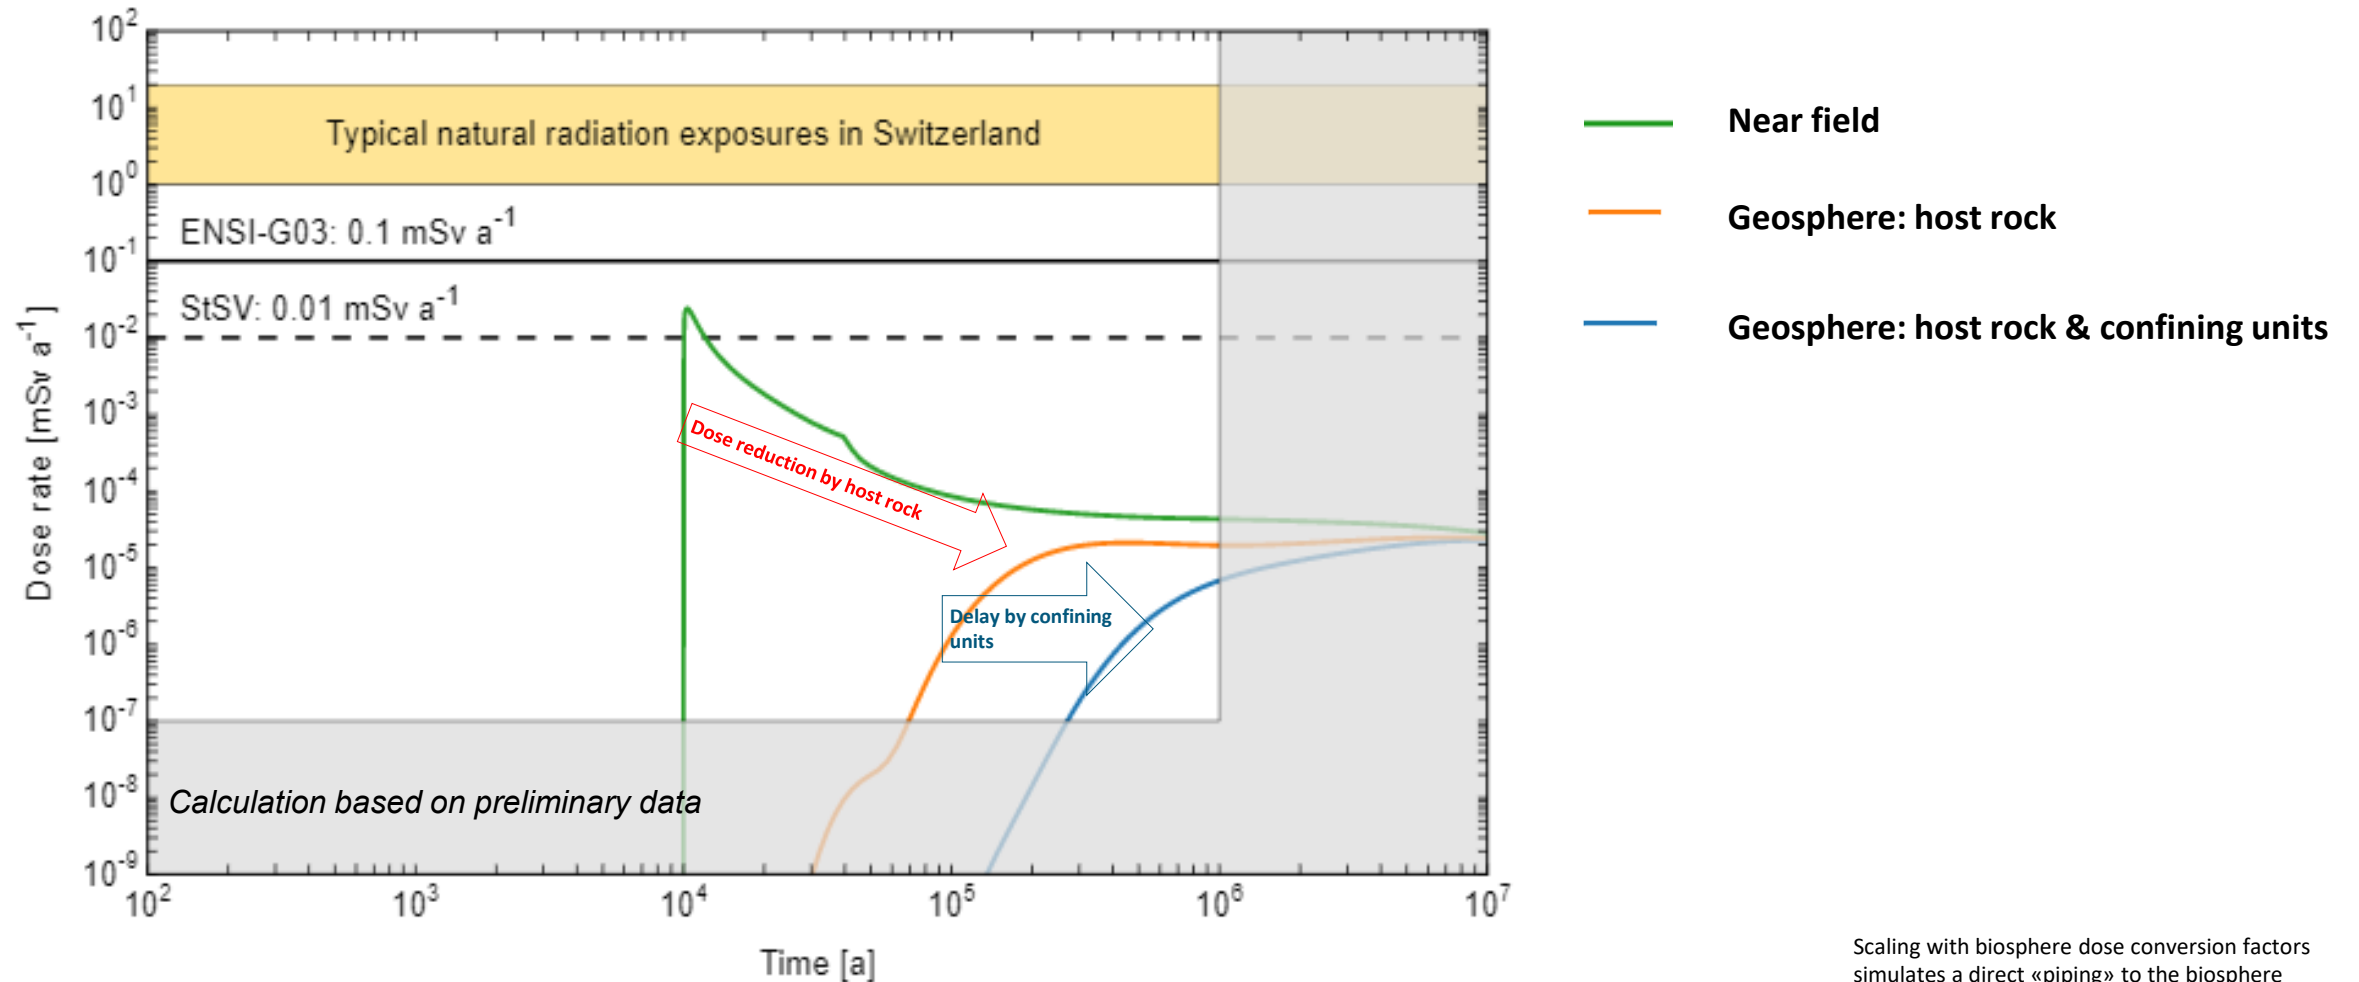

Scaling with biosphere dose conversion factors  
simulates a direct «piping» to the biosphere

# Construction: revised rock testing methodology

- Sample **Conditioning**
- **CT scan** allows variability assessment
- In-machine saturation / equilibration
- All triax-tests **pore-pressure controlled**
- **multiple labs** for cross checking

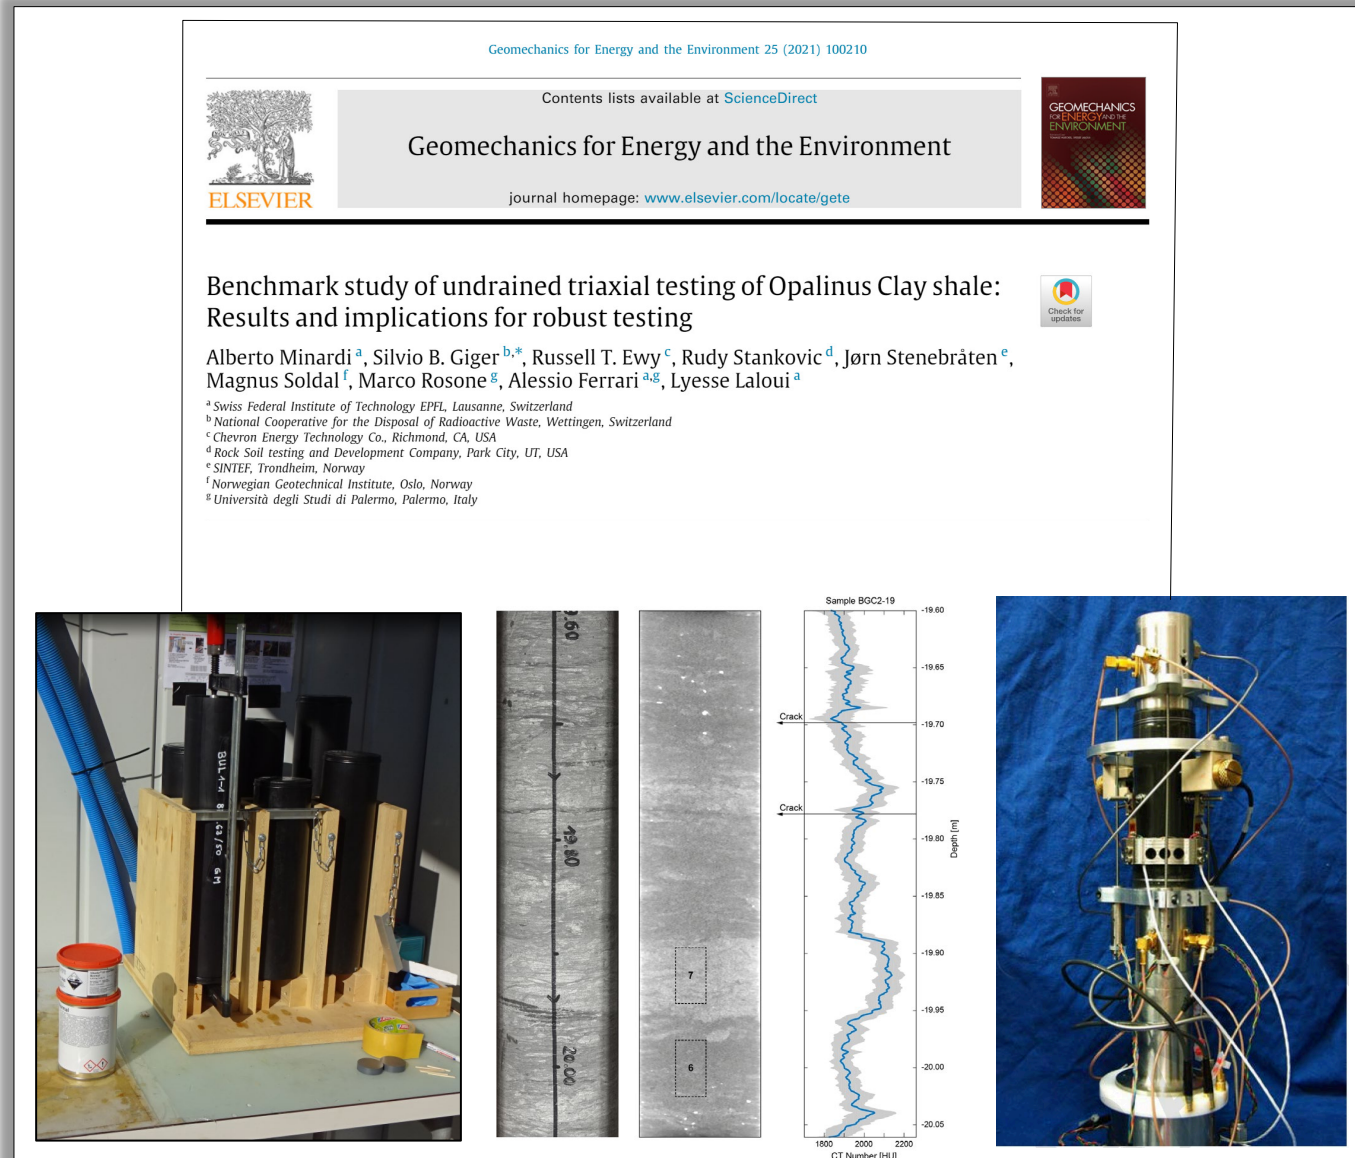

# Construction: core data to emplacement chamber design (crit. 4.1)

- Rock testing results
  - **low variability**
- Design calculations
  - according to **standard engineering methods**
  - key parameter: **residual strength**
- Effort for construction
  - similar at all sites
  - Repository **at 900 m feasible**

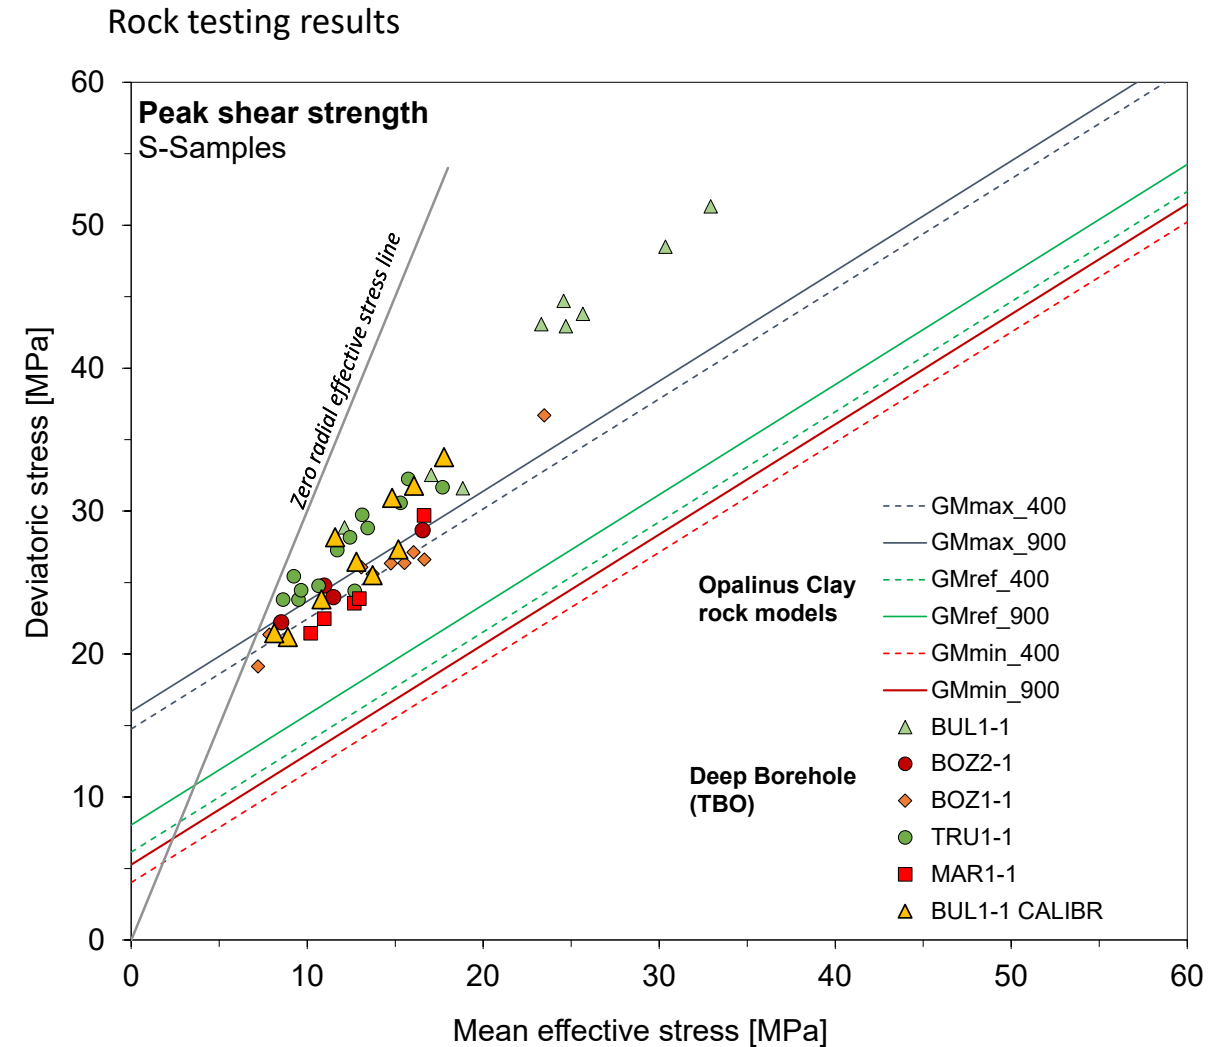

# Repository effects: gas transport (L/ILW case)

- gas production in L/ILW
- mainly  $H_2$  from corrosion
- **site conditions and properties** from borehole samples and in-situ tests
- **gas testing of faults**
- model-based assessment
- adjust seal permeabilities to control gas pressure

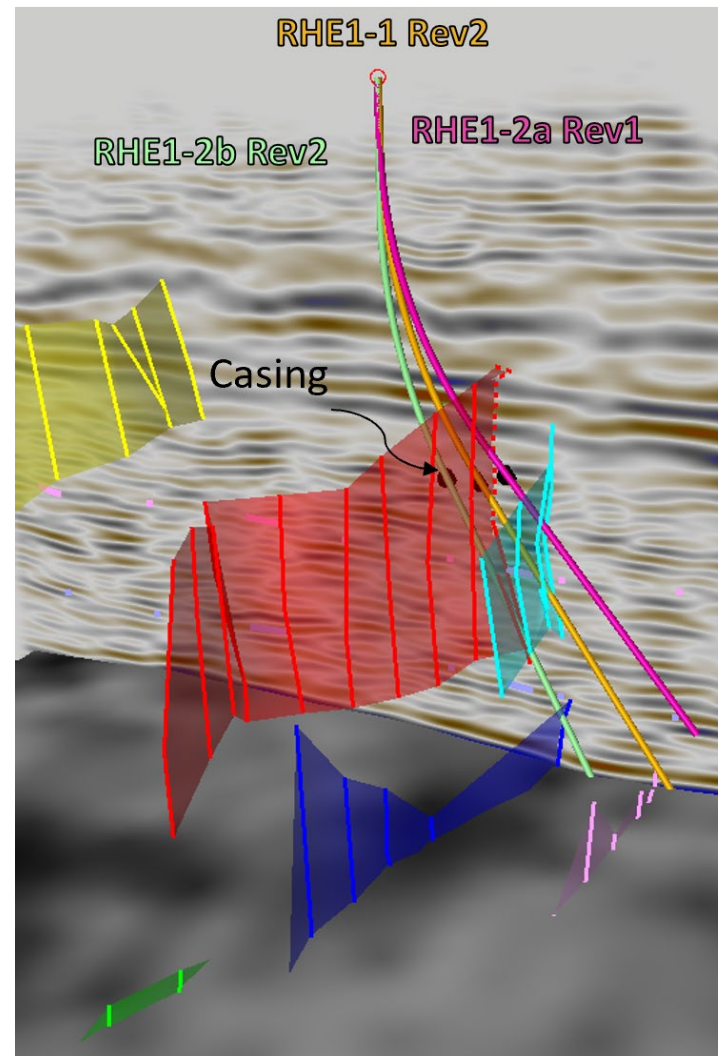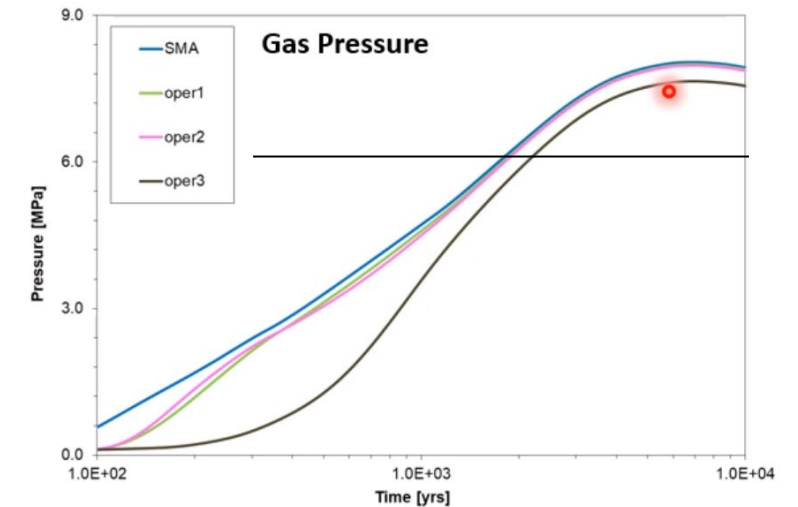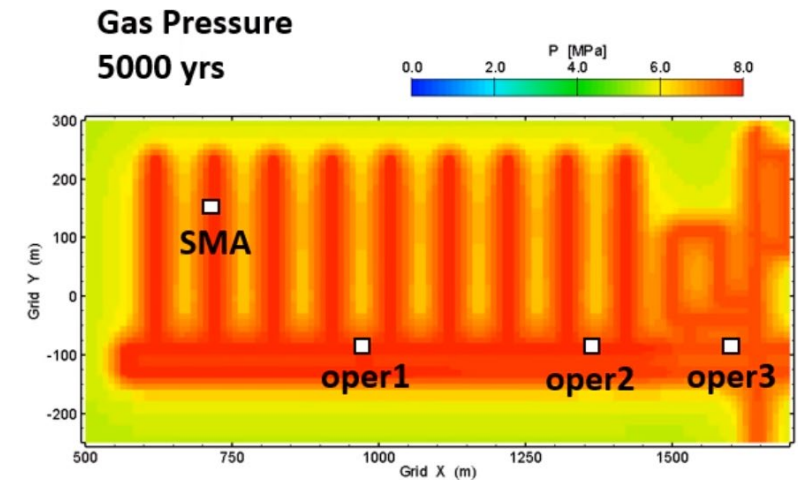

L/ILW caverns

NTB 16-03

# Site selection for the best clay-hosted repository in Switzerland

## ■ Switzerland with similar site-selection strategy as Germany

- White Map
- Stepwise narrowing-in using technical / scientific criteria
- Safety driven only («best site»)
- Transparency and participation integrated from the start

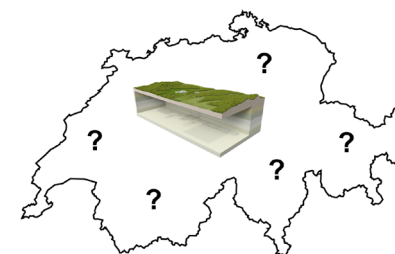

## ■ 2 of 3 steps in Switzerland completed

- 3 sites remaining. Similar and simple geology: Flat-lying sediments with 100 m thick clay layer
- Additional dose by repository far below regulatory limit in all regions

## ■ 3rd step / «Etappe» ongoing

- Surface based exploration to feed site selection and safety case
- Acquisition of reliable high-quality data (undisputable decision basis)
- Seismic surveys: available space
- Cored boreholes: depth calibration of seismic data, properties

## ■ Oct '22 announcement of site(s)

## ■ '24 general license application

### Criteria

- 1.1 Spatial extent
- 1.2 Hydraulic barrier effect
- 1.3 Geochemical conditions
- 1.4 Release pathways

- 2.1 Stability of the site and rock properties
- 2.2 Erosion
- 2.3 Repository-induced influences
- 2.4 Conflicts of use

- 3.1 Ease of characterisation of the rock
- 3.2 Explorability of spatial conditions
- 3.3 Predictability of long-term changes

- 4.1 Rock mechanical properties and conditions
- 4.2 Underground access and drainage

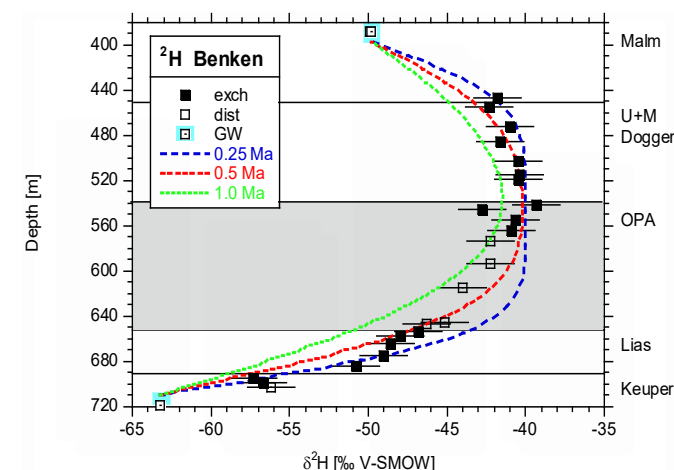

Supplement: Supplementary file 1 [file sand-1-51-2021-supplement.pdf]
